# Supplementary material for: Effects of Dietary or Supplementary Micronutrients on Sex Hormones and IGF-1 in Middle and Older Age: A Systematic Review and Meta-Analysis
Source: MDPI journal article supplement (doi:10.3390/nu12051457), 2020-05-18
Supplement: s1 [file s1]

**Supplementary Table E – Table of Characteristics for RCTs (n=26)**

| Author, Year (Country) [number]            | Study length             | Aims                                                                                                                                        | Setting                                                        | Participants                                                                                                                                  | Intervention                                                                                                                                                        | Control           | Outcomes                                          |                                                        | Funding                                                                                                                                   |
|--------------------------------------------|--------------------------|---------------------------------------------------------------------------------------------------------------------------------------------|----------------------------------------------------------------|-----------------------------------------------------------------------------------------------------------------------------------------------|---------------------------------------------------------------------------------------------------------------------------------------------------------------------|-------------------|---------------------------------------------------|--------------------------------------------------------|-------------------------------------------------------------------------------------------------------------------------------------------|
| <b>Alehagen, 2017 (Sweden) [135]</b>       | 4-year RCT.              | To examine the effects of supplementation with selenium and coenzyme Q10 on concentrations of IGF-1 and its binding protein IGFBP-1.        | Community based.                                               | 215 participants, a significant proportion had cardiovascular disease and/or metabolic dysfunction (mean age: 76.6, 53% males) were selected. | Dietary supplementation of 200 mg/day of coenzyme Q10 capsules and <b>200 µg/day of organic selenium yeast tablets.</b>                                             | Placebo.          | <b>IGF-1</b> measured by radioimmunoassay.        | <b>Selenium</b> measured in blood (unclear technique). | Family Erling-Persson Foundation, Medical Research Council, Pharma Nord Aps and the County Council of Östergötland, Linköping University. |
| <b>Amsterdam, 2005 (Netherlands) [143]</b> | 15 month RCT.            | To investigate the effects of 200mg/day of Vitamin E in elderly subjects on neopterin and DHEA-S.                                           | Community based.                                               | 100 healthy participants (mean age: 74; 50% male; BMI: 26.9) from the Netherlands area.                                                       | <b>Vitamin E</b> - Oral 200mg. 2 capsules/day for up to 15months.                                                                                                   | Soybean oil.      | <b>DHEAS</b> measured by enzyme immunoassay.      | <b>Vitamin E</b> measured by "blood sample".           | Unclear.                                                                                                                                  |
| <b>Bonjour, 2011 (France) [130]</b>        | 6-week Cross-over trial. | To investigate the beneficial effect of the consumption of soft plain cheese on bone resorption markers in institutionalized elderly women. | Six French nursing homes or other institutions for the elderly | 29 females (mean age: 86.9, BMI: 29.0) were selected.                                                                                         | Two servings of 100g of Soft plain cheese each were taken every day during 6 weeks. they provided daily: 164 Kcal; <b>2.5 µg vitamin D</b> ; 302 mg calcium; 233 mg | Cross-over trial. | <b>IGF-1</b> measured by immunoradiometric assay. | <b>Vitamin D</b> measured by radioimmuno assay.        | YOPLAIT France.                                                                                                                           |

|                                                       |                                                |                                                                                                                                                                                                                                                                 |                                                                                                                                                                                     |                                                                                                                              |                                                                                                                                                                                                                                                                                             |                                                                                                          |                                                                           |                                                                                 |                                                                      |
|-------------------------------------------------------|------------------------------------------------|-----------------------------------------------------------------------------------------------------------------------------------------------------------------------------------------------------------------------------------------------------------------|-------------------------------------------------------------------------------------------------------------------------------------------------------------------------------------|------------------------------------------------------------------------------------------------------------------------------|---------------------------------------------------------------------------------------------------------------------------------------------------------------------------------------------------------------------------------------------------------------------------------------------|----------------------------------------------------------------------------------------------------------|---------------------------------------------------------------------------|---------------------------------------------------------------------------------|----------------------------------------------------------------------|
|                                                       |                                                |                                                                                                                                                                                                                                                                 |                                                                                                                                                                                     |                                                                                                                              | phosphorus<br>14.2 g proteins.                                                                                                                                                                                                                                                              |                                                                                                          |                                                                           |                                                                                 |                                                                      |
| <b>Gann, 2015<br/>(USA)<br/>[82]</b>                  | 6<br>month<br>RCT.                             | A Phase II<br>repeat biopsy<br>trial in men<br>with high-<br>grade<br>prostatic<br>intraepithelial<br>neoplasia<br>who were<br>randomly<br>assigned to<br>either a<br>placebo or<br>capsules of<br>'Lyc-Mato'<br>for a period of<br>approximatel<br>y 6 months. | North-<br>western<br>Memorial<br>Hospital and<br>the Jesse<br>Brown<br>Veterans<br>Administrati<br>on Medical<br>Centre in<br>Chicago.                                              | 58 males<br>(mean age: 65)<br>with a<br>confirmed<br>diagnosis of<br>high grade<br>intraepithelial<br>prostate<br>neoplasia. | The lycopene<br>group<br>consumed 2<br>daily capsules<br>of Lyc-O-Mato,<br>containing <b>15<br/>mg of<br/>lycopene</b> per<br>soft gel capsule<br>(‘Lycored’, Ltd,<br>Beer Sheva,<br>Israel). The<br>men were<br>instructed to<br>take 1 capsule<br>with breakfast<br>and 1 with<br>dinner. | Placebo soft gel<br>capsules<br>contained<br>medium-chain<br>triglycerides and<br>red food<br>colouring. | <b>Serum IGF-1, IGFBP3</b><br>were measured by<br>enzyme<br>immunoassay.  | <b>Serum<br/>lycopene</b><br>concentration<br>s were<br>measured by<br>LC-MS-MS | National Institute<br>of Health,<br>National Institute<br>of Cancer. |
| <b>Gee, 2013<br/>(USA)<br/>[123]</b>                  | 4 week<br>- Phase<br>II open<br>label,<br>RCT. | To determine<br>if $1\alpha$ -OH-D2<br>modulates<br>intermediate<br>endpoint<br>biomarkers of<br>potential<br>significance in<br>the<br>development<br>of prostate<br>cancer.                                                                                   | Multi-centre<br>trial<br>conducted at<br>University of<br>Wisconsin<br>Carbone<br>Cancer<br>Centre, the<br>Medical<br>College of<br>Wisconsin,<br>and the<br>University of<br>Iowa. | 31 white<br>males (mean<br>age: 58.9, BMI:<br>29.1) with<br>histological<br>confirmation<br>of prostate<br>cancer.           | <b>10µg/day <math>1\alpha</math>-<br/>hydroxyvitami<br/>n D2</b> × 4 weeks<br>prior to<br>surgery.                                                                                                                                                                                          | Observation<br>only.                                                                                     | <b>IGF-1</b> measured by<br>immunoassay.                                  | Unknown<br>measurement<br>method for<br><b>Vitamin D<br/>metabolites.</b>       | National Institute<br>of Health.                                     |
| <b>Heijboer,<br/>2015<br/>(Netherlands)<br/>[127]</b> | Post-<br>hoc<br>analysi<br>s of<br>RCT.        | To investigate<br>the existence<br>of a causal<br>link between<br>vitamin D and                                                                                                                                                                                 | Study 1:<br>Heart failure<br>patients (6<br>week trial).                                                                                                                            | 92 males<br>(median age:<br>63; median<br>BMI: 27)                                                                           | <b>2000 IU<br/>cholecalciferol</b><br>daily for 6<br>weeks. Blood<br>was drawn in                                                                                                                                                                                                           | Placebo.                                                                                                 | <b>Testosterone</b><br>measured using a 2nd<br>generation<br>immunoassay. | <b>Serum<br/>1,25(OH)2D</b><br>using liquid<br>chromatogra                      | Grants from 3<br>independent<br>bodies.                              |

|                                          |              |                                                                                                                                                                                                                                                                 |                                                                                                                                   |                                                                                                           |                                                                                                                                                                                                  |          |                                                |                                                                         |                                                                                      |
|------------------------------------------|--------------|-----------------------------------------------------------------------------------------------------------------------------------------------------------------------------------------------------------------------------------------------------------------|-----------------------------------------------------------------------------------------------------------------------------------|-----------------------------------------------------------------------------------------------------------|--------------------------------------------------------------------------------------------------------------------------------------------------------------------------------------------------|----------|------------------------------------------------|-------------------------------------------------------------------------|--------------------------------------------------------------------------------------|
|                                          |              | testosterone. We studied the effect of vitamin D supplementati on on testosterone concentration s in three independent intervention studies including males suffering from heart failure, male elderly home nursing residents, and male non-Western immigrants. | Study 2: male nursing home residents (16 week trial).<br><br>Study 3: Male non-Western Immigrants in Netherlands (16 week trial). | suffering from heart failure.                                                                             | the morning, at 0, 3 and 6 weeks after starting supplements.                                                                                                                                     |          |                                                | phy mass-spectrometry.                                                  |                                                                                      |
|                                          |              |                                                                                                                                                                                                                                                                 |                                                                                                                                   | 49 males (mean age: 82) were selected from a nursing home.                                                | <b>Oral vitamin D3</b> either 600 IU per day, 4200 IU per week or 18 000 IU/month in a daily, weekly or monthly dose. In this study, only the male patients with daily supplements were studied. | Placebo. |                                                | <b>Serum 1,25(OH)2D</b> using radio-immunoassay .                       | ZonMw, The Netherlands Organisation for Health Research and Development & The Hague. |
|                                          |              |                                                                                                                                                                                                                                                                 |                                                                                                                                   | 42 vitamin D deficient males (mean age 53, BMI: 29) who were non-western immigrants from The Netherlands. | <b>1200IU of Vitamin D.</b> Blood was drawn, in the early morning, at baseline, after 8 and 16 weeks. All participants received calcium 500 mg per day as calcium carbonate.                     | Placebo. |                                                | <b>Serum 1,25(OH)2D</b> using liquid chromatogra phy mass-spectrometry. | ZonMw, The Netherlands Organisation for Health Research and Development & The Hague. |
| <b>Hoenjet, 2005 (Netherlands) [139]</b> | 21-week RCT. | To assess the effect of a nutritional supplement containing vitamin E,                                                                                                                                                                                          | Outpatient department.                                                                                                            | 80 males (mean age: 73.9) with a diagnosis of prostate                                                    | A daily supplement with either <b>vitamin E (350mg), selenium</b>                                                                                                                                | Placebo. | Unclear how <b>Testosterone was extracted.</b> | Unclear.                                                                | AstraZeneca, Zoetermeer, The Comprehensive Cancer Centre Limburg.                    |

|                                 |              |                                                                                                                                                                                                         |                                                        |                                                                                                                            |                                                                                                                                                                                          |                                                                                                         |                                                                        |                                                       |                      |
|---------------------------------|--------------|---------------------------------------------------------------------------------------------------------------------------------------------------------------------------------------------------------|--------------------------------------------------------|----------------------------------------------------------------------------------------------------------------------------|------------------------------------------------------------------------------------------------------------------------------------------------------------------------------------------|---------------------------------------------------------------------------------------------------------|------------------------------------------------------------------------|-------------------------------------------------------|----------------------|
|                                 |              | selenium, vitamin C and coenzyme Q10 on changes in serum levels of PSA in patients with hormonally untreated carcinoma of the prostate and rising PSA levels.                                           |                                                        | cancer were included.                                                                                                      | (200micrograms), vitamin C (750mg), coenzyme Q10 (2x100mg) for 21 weeks.                                                                                                                 |                                                                                                         |                                                                        |                                                       |                      |
| <b>Holick, 2010 (USA) [133]</b> | 14 week RCT. | To investigate whether supplementation with phytochemicals and nutrients essential for bone health added to lifestyle modification influences markers of bone turnover in healthy postmenopausal women. | Functional Medicine Research Centre in Gig Harbor, WA. | 32 majority Caucasian post-menopausal females (mean age: 58.1, BMI: 27) with and without metabolic syndrome were selected. | 1 tablet twice daily. Each tablet contained <b>200 mg RIAA, 100 mg berberine sulphate trihydrate (equivalent to 69 mg berberine), 500 IU vitamin D3 and 500 µg vitamin K1</b> + control. | Mediterranean-style, low glycaemic load diet and to engage in exercise.                                 | <b>IGF-1</b> measured using enzyme-linked immunosorbent assay (ELISA). | <b>Serum vitamin D</b> measured by mass spectrometry. | Metagenics Inc.      |
| <b>Jensen, 2002 (USA) [137]</b> | 3-year RCT.  | Comparing the long-term effects on bone turnover markers and calciotropic hormones of a                                                                                                                 | University of California.                              | 57 postmenopausal females (mean age: 66, BMI: 25.5) were selected.                                                         | Women in the multi-nutrient group took 6 tablets of a different supplement, containing: <b>Ca,</b>                                                                                       | The active control group received dietary instruction targeting the consumption of <b>≥800 mg Ca/d,</b> | <b>IGF-1</b> measured by 2-site immunoassay.                           | <b>Vitamin D</b> was measured by extraction of serum. | Shaklee Corporation. |

|                                         |                       |                                                                                                                                                                                                  |                                       |                                                                                                                                  |                                                                                                                                                                                                                                           |                                                                            |                                                                   |                                                       |                                            |
|-----------------------------------------|-----------------------|--------------------------------------------------------------------------------------------------------------------------------------------------------------------------------------------------|---------------------------------------|----------------------------------------------------------------------------------------------------------------------------------|-------------------------------------------------------------------------------------------------------------------------------------------------------------------------------------------------------------------------------------------|----------------------------------------------------------------------------|-------------------------------------------------------------------|-------------------------------------------------------|--------------------------------------------|
|                                         |                       | multi-nutrient supplement, a calcium and vitamin D supplement, and dietary instruction aimed at increasing calcium intake through foods. (only multi-nutrient vs placebo group used in this SR). |                                       |                                                                                                                                  | P, 400 IU vitamin D, Mg, B, Zn, Mn, Cu, I, Cr, Mo, Ni, Se, Sn V, Si, biotin, folic acid, niacin, pantothenic acid, vitamin A, thiamine, riboflavin, vitamin B-6, vitamin B-12, vitamin C, vitamin E, and vitamin K (see study for doses). | with an ideal goal of 1450 mg/d.                                           |                                                                   |                                                       |                                            |
| <b>Kamycheva, 2013 (Norway) [122]</b>   | 12 month RCT.         | To determine the relationship between vitamin D status and levels of GH and IGF-1: and whether vitamin D supplementation may cause the changes in the parameters of GH-IGF-1 axis.               | Outpatient department.                | 318 participants (mean age: 49.2; 38% male; BMI: 34.6) split into three groups: DD, DP, PP. Also stratified by BMI (<35 or >35). | <b>20,000IU Vitamin D</b> - per capsule (2x in the DD group, or 1x in the DP group) + <b>500mg Calcium.</b>                                                                                                                               | Placebo capsule (1x in DP group or 2x in PP group) + <b>500mg calcium.</b> | <b>IGF-1</b> measured using chemiluminescent immunometric assays. | <b>Serum vitamin D</b> measured by radioimmuno assay. | Northern Norway Regional Health Authority. |
| <b>Kranse, 2005 (Netherlands) [140]</b> | 6-week RCT crossover. | The objective of this study was to show or to exclude                                                                                                                                            | Departments of Urology of the Erasmus | 37 males (median age 70, and weight 81kg) with                                                                                   | The intervention contained: <b>Vitamin E</b>                                                                                                                                                                                              | Control supplements: margarine and drink contained                         | <b>Testosterone</b> measured by radioimmunoassay.                 | <b>Antioxidants</b> measured by mass spectrometry.    | Unilever Research Laboratories.            |

|                               |             |                                                                                                                                                                     |                                                |                                                                                             |                                                                                                                                                                                                                                                                                               |                                       |                                 |                                   |                                                                                  |
|-------------------------------|-------------|---------------------------------------------------------------------------------------------------------------------------------------------------------------------|------------------------------------------------|---------------------------------------------------------------------------------------------|-----------------------------------------------------------------------------------------------------------------------------------------------------------------------------------------------------------------------------------------------------------------------------------------------|---------------------------------------|---------------------------------|-----------------------------------|----------------------------------------------------------------------------------|
|                               |             | an effect of dietary supplement on rising prostate-specific antigen (PSA) levels.                                                                                   | Medical Centre and the St. Franciscus Gasthuis | confirmed rising PSA levels and no evidence of prostate cancer.                             | <b>(50mg of alpha tocopherol), Phytosterols (1.5g), Selenium (0.2mg organic selenium in 0.5g bakers yeast).</b> The beverage contained: <b>green tea, isoflavones (100mg phytoestrogens, 60mg genistein, 40mg daidzein), Carotenoids (10mg lutein, 10mg lycopene, 10mg palm carotenoids).</b> | none of the intervention ingredients. |                                 |                                   |                                                                                  |
| <b>Kucuk, 2001 (USA) [52]</b> | 3-week RCT. | To investigate the effect of lycopene supplementation on cancerous and benign prostate tissues and on serum levels of PSA, IGF-1, and IGFBP-3 of patients with PCa. | Unclear                                        | 26 males (mean age: 62.2). Participants were: 19% African-American, 80% Caucasian American. | 4-week supply of <b>15 mg lycopene capsules</b> (Lyc-O-Mato).                                                                                                                                                                                                                                 | Placebo.                              | <b>IGF-1</b> measured by ELISA. | <b>Lycopene</b> measured by HPLC. | Virtual Discovery Grant from Barbara Ann Karmanos Cancer Institute, Detroit, MI. |

|                                        |                                   |                                                                                                                                                                                |                                                        |                                                                                                         |                                                                                                                                                                                                                                      |                                                                                                       |                                                                                                                       |                                                                                |                                                               |
|----------------------------------------|-----------------------------------|--------------------------------------------------------------------------------------------------------------------------------------------------------------------------------|--------------------------------------------------------|---------------------------------------------------------------------------------------------------------|--------------------------------------------------------------------------------------------------------------------------------------------------------------------------------------------------------------------------------------|-------------------------------------------------------------------------------------------------------|-----------------------------------------------------------------------------------------------------------------------|--------------------------------------------------------------------------------|---------------------------------------------------------------|
| <b>Lamb, 2011 (USA) [134]</b>          | 14-week RCT.                      | The objective of this study was to investigate whether phytochemicals and nutrients would affect the markers of bone turnover in postmenopausal women with metabolic syndrome. | Functional Medicine Research Centre in Gig Harbor, WA. | 47 females (mean age: 60.3, BMI: 32.2) with metabolic syndrome were selected.                           | 1 tablet twice daily. Each tablet contained <b>200 mg RIAA, 100 mg berberine sulphate trihydrate (equivalent to 69 mg berberine), 500 IU vitamin D3 and 500 µg vitamin K1</b> . Neither arm received supplemental calcium + control. | Mediterranean-style, low glycaemic load diet and to engage in exercise.                               | <b>IGF-1</b> measured by immunosorbent assay.                                                                         | <b>Serum 25OHD</b> measured by liquid chromatography-tandem mass spectrometry. | Metagenics Inc.                                               |
| <b>Lerchbaum, 2018 (Austria) [128]</b> | Post-hoc analysis of 12 week RCT. | To analyse the effect of vitamin D on androgen levels in men with low baseline serum total testosterone levels.                                                                | Medical University of Graz, Austria.                   | 94 men (median age: 49, median BMI: 28.6).                                                              | Oral dose of <b>20,000IU</b> (equivalent to 2857IU/day) <b>vitamin D</b> weekly as 50 oily drops for 12 weeks.                                                                                                                       | 50 oily drops without vitamin D for 12 weeks. The oil contained the same oil as the Vitamin D3 drops. | <b>Total testosterone</b> measured by liquid chromatography.                                                          | <b>25(OH)D</b> measured by liquid chromatography.                              | Austrian National Bank (OeNB Jubilaeumsfonds Project 14846).  |
| <b>Mason, 2016 (USA) [125]</b>         | 12 month RCT.                     | To Investigate the effects of vitamin D3 supplementation vs placebo on changes in sex steroid hormones among overweight                                                        | Outpatient department.                                 | 218 postmenopausal women (mean age: 59.7, BMI: 32.4). Participants were: 86.2% non-hispanic white, 6.4% | <b>2000IU/day oral vitamin D3</b> supplementation alongside the ViDA weight loss program (diet and exercise component).                                                                                                              | Placebo (sunflower oil) and ViDA weight loss program.                                                 | <b>Estrone, estradiol and testosterone</b> measured by radioimmunoassay; <b>SHBG</b> by chemiluminescent immunoassay. | <b>Vitamin D</b> measured by chemiluminescence.                                | Breast Cancer Research Foundation, National Cancer Institute. |

|                                     |              |                                                                                                                                                        |                        |                                                                                                                |                                                                                                                                                                                                                                                                                                                                                                     |                               |                                            |                                                                                                                     |                               |
|-------------------------------------|--------------|--------------------------------------------------------------------------------------------------------------------------------------------------------|------------------------|----------------------------------------------------------------------------------------------------------------|---------------------------------------------------------------------------------------------------------------------------------------------------------------------------------------------------------------------------------------------------------------------------------------------------------------------------------------------------------------------|-------------------------------|--------------------------------------------|---------------------------------------------------------------------------------------------------------------------|-------------------------------|
|                                     |              | and obese post-menopausal women with low circulating vitamin D.                                                                                        |                        | non-hispanic black, 0.9% hispanic and 6.4% other.                                                              |                                                                                                                                                                                                                                                                                                                                                                     |                               |                                            |                                                                                                                     |                               |
| <b>Persson, 2007 (Sweden) [132]</b> | 4-month RCT. | Effects of combined nutritional treatment of patients at risk of protein-energy malnutrition (PEM) discharged from a geriatric service were evaluated. | Outpatient department. | 108 elderly participants (mean age: 85, BMI: 20.2) at risk of protein-energy malnutrition (PEM) were selected. | Increased intake of fat by full-fat milk instead of low-fat milk; cream and creme fraiche in their cooking and to eat more snacks between meals. Also prescribed a liquid supplement (Sempers, 200 ml/package) and a daily multivitamin supplement: 'Friggss' (containing: <b>vitamins A, E, C, B1, B2, niacin, Fe, Iodine, Cu, Ma, Se, molybdenum, Chromium</b> ). | Brief written dietary advice. | <b>IGF-1</b> measured by radioimmunoassay. | <b>Serum 25 OHD</b> measured by radio-receptor assay. <b>Zinc</b> measured by atomic absorption photo-spectrometry. | The Swedish Research Council. |



|                                         |               |                                                                                                                                             |                                                    |                                                                                                                                               |                                                                                                                                                              |                                                                                                      |                                                                      |                                                                            |                                                                                                                                               |
|-----------------------------------------|---------------|---------------------------------------------------------------------------------------------------------------------------------------------|----------------------------------------------------|-----------------------------------------------------------------------------------------------------------------------------------------------|--------------------------------------------------------------------------------------------------------------------------------------------------------------|------------------------------------------------------------------------------------------------------|----------------------------------------------------------------------|----------------------------------------------------------------------------|-----------------------------------------------------------------------------------------------------------------------------------------------|
| <b>Rodondi, 2009 (Switzerland) [61]</b> | 4 week RCT.   | To assess the effect of zinc supplements on IGF-I, bone remodelling and physical performance responses in undernourished, elderly patients. | Tertiary care geriatric hospital.                  | 61 participants (mean age: 85; 15% male), with a mini nutritional assessment score of 17-24. 8 participants untreated.                        | <b>30mg/day Zinc</b> + 20g oral protein (15g whey, 5g amino acids) & <b>550mg Calcium.</b>                                                                   | Same as intervention, except no Zinc.                                                                | <b>IGF-1 &amp; IGF-1</b> binding protein-3 measured by Immunoassays. | <b>Zinc</b> measured by the Randox colorimetric method.                    | Norvartis Consumer Health.                                                                                                                    |
| <b>Sinha-Hikim, 2014 (USA) [124]</b>    | 12 month RCT. | To examine the effect of vitamin D supplementation on non-stressed serum concentrations of hsCRP, IL-6, PAI-1, TNF-alpha and IGF-1.         | Outpatient department.                             | 80 participants (mean age: 52; 70% female; BMI: 32.7; 86.5% Latino & 13.5% African American) diagnosed with pre-diabetes and hypovitaminosis. | A weekly dose of <b>vitamin D3</b> (determined by formula for each participant). This dose was adjusted based on the vitamin D level.                        | Pre-filled syringe of placebo (medium-chained triglycerides). No dietary or supplement advice given. | <b>IGF-1</b> measured by ELISA kits.                                 | <b>Serum Vitamin D</b> measured by high performance liquid chromatography. | National Institute of Health.                                                                                                                 |
| <b>Torbergesen, 2019 (Norway) [136]</b> | 4-month RCT.  | To examine the effect of nutrition supplementation on bone turnover markers.                                                                | Orthopaedic ward, Oslo University Hospital, Norway | Total of 71 subjects (mean age: 83, BMI: 25, 79% Female).                                                                                     | Supplement consisting of: 150µg Vitamin K1, <b>20µg vitamin D3</b> , 1000mg Ca, <b>250µg Vitamin A</b> , <b>10mg Vitamin E</b> and 1.2g Omega-3 fatty acids. | Usual care in the orthopaedic ward without any systematic nutritional advice/supplements.            | <b>IGF-1</b> measured by ELISA.                                      | <b>25 (OH) D:</b> Radioimmunoassay; <b>Vitamin E:</b> Radioimmunoassay.    | Research fellowship grant from Clinic of Medicine, Oslo University Hospital and the Sophies Minde Ortopedi Foundation. (Grant no 187980/H10). |

|                                               |                                  |                                                                                                                                                                                                    |                                                                        |                                                                                                                                          |                                                                                                               |                                                                                                                  |                                                         |                                                                     |                                                         |
|-----------------------------------------------|----------------------------------|----------------------------------------------------------------------------------------------------------------------------------------------------------------------------------------------------|------------------------------------------------------------------------|------------------------------------------------------------------------------------------------------------------------------------------|---------------------------------------------------------------------------------------------------------------|------------------------------------------------------------------------------------------------------------------|---------------------------------------------------------|---------------------------------------------------------------------|---------------------------------------------------------|
| <b>Trummer, 2017 (Austria) [131]</b>          | Post-hoc analysis of 8-week RCT. | To determine whether Vitamin D supplementation vs placebo has an effect on IGF-1 concentrations (post hoc analysis of Vitamin D RCT).                                                              | Medical university of Graz.                                            | 175 participants (mean age: 60, 49% female, BMI: 30.2) with a diagnosis of hypertension and a serum vitamin D concentration of <30ng/mL. | <b>2800 IU of vitamin D3</b> as seven oily drops per day.                                                     | matching placebo as seven oily drops per day for eight weeks.                                                    | <b>IGF-1</b> measured by chemiluminescence immunoassay. | <b>Serum 1,25(OH)2D</b> measured by Chemiluminescence immunoassays. | Unclear.                                                |
| <b>Vidlar, 2010 (Czech Republic) [141]</b>    | 6 month RCT                      | To evaluate the safety & tolerability of consumption of 570 mg silymarin and 240µg selenium as a dietary supplement to be used in the tertiary prevention in patients after Radical Prostatectomy. | Department of Urology, University Hospital in Olomouc, Czech Republic. | 37 males (mean age: 63.7, BMI: 28.1) that were 2-3 months post Radical Prostatectomy.                                                    | <b>240 µg of selenium</b> (as selenomethionine) and 570 mg of silymarin daily for 6 months                    | Placebo, instructed not to consume food rich in phenolics or make dietary or lifestyle changes during the study. | <b>Testosterone</b> measured by Immunoassay.            | <b>Plasma selenium</b> measured by atomic absorption spectrometry.  | Czech Ministry of Education, Youth and Sports.          |
| <b>Vostalova, 2013 (Czech Republic) [142]</b> | 6 month RCT                      | The aim of this double-blind, placebo controlled clinical trial was to assess the effects of a combination of selenium                                                                             | Department of Urology, University Hospital in Olomouc, Czech Republic. | 55 healthy males (mean age: 55, BMI: 28) with lower urinary tract symptoms and benign prostate hyperplasia.                              | <b>240 µg of selenium</b> (in the form of yeast l-selenomethionine) plus 570 mg silymarin daily for 6 months. | Instructed not to change diet or lifestyle during the study.                                                     | <b>Testosterone</b> measured by Immunoassay.            | <b>Plasma Selenium</b> measured by atomic absorption spectrometry.  | Institutional Support of Palacky University in Olomouc. |

|                                          |                        |                                                                                                                                                                    |                                      |                                                                                                                                          |                                                                                                                                                                   |                                                                                      |                                                   |                                                                    |                                       |
|------------------------------------------|------------------------|--------------------------------------------------------------------------------------------------------------------------------------------------------------------|--------------------------------------|------------------------------------------------------------------------------------------------------------------------------------------|-------------------------------------------------------------------------------------------------------------------------------------------------------------------|--------------------------------------------------------------------------------------|---------------------------------------------------|--------------------------------------------------------------------|---------------------------------------|
|                                          |                        | and silymarin in men with lower urinary tract symptoms, benign prostatic hyperplasia and a prostate specific antigen (PSA) $\leq 2.5$ ng/ml                        |                                      |                                                                                                                                          |                                                                                                                                                                   |                                                                                      |                                                   |                                                                    |                                       |
| <b>Vrieling, 2007 (Netherlands) [81]</b> | 8 week RCT - crossover | To investigate the effect of supplementation with tomato-derived lycopene (30 mg/d) on serum concentrations of total IGF-I, IGF-II, IGFBP-1, IGFBP-2, and IGFBP-3. | 4 hospitals in the Netherlands area. | 40 males (mean age: 58.1, BMI: 26.5) and 31 females (mean age: 61.1, BMI: 27.2) were selected.                                           | The lycopene capsules ('Lyc-OMato') contained <b>~15 mg total lycopene/capsule</b> . They were asked to take 2 capsules per day.                                  | Placebo                                                                              | <b>IGF-1</b> measured by electrochemiluminescence | <b>Lycopene</b> measured by High-performance liquid chromatography | Dutch Cancer Society.                 |
| <b>Walfisch, 2007 (Israel) [80]</b>      | 2-65 day RCT.          | To compare concentrations of IGF-I and its binding protein IGFBP-3 in patients with colon cancer who were supplemented for a short term either                     | Outpatient department.               | 56 participants with colon cancer in the community (mean age: 68.5, 63% male, BMI: 27.35) were selected a few days-weeks before surgery. | Supplement of Lycopene containing <b>15 mg lycopene</b> . The participants were asked to take one capsule twice daily ( <b>30mg lycopene/day</b> ) with meals and | The placebo contained refined regular edible oil instead of the oleoresin component. | <b>IGF-1</b> measured by radioimmunoassay.        | <b>Lycopene</b> measured by HPLC.                                  | 'LycoRed' Natural Product Industries. |

|                                  |              |                                                                                                       |          |                                                                                                                                                                        |                                                                                |                                                                                                         |                                                                                |                                                   |                                                               |
|----------------------------------|--------------|-------------------------------------------------------------------------------------------------------|----------|------------------------------------------------------------------------------------------------------------------------------------------------------------------------|--------------------------------------------------------------------------------|---------------------------------------------------------------------------------------------------------|--------------------------------------------------------------------------------|---------------------------------------------------|---------------------------------------------------------------|
|                                  |              | with a placebo or with a supplement containing lycopene.                                              |          |                                                                                                                                                                        | not to change their regular diet.                                              |                                                                                                         |                                                                                |                                                   |                                                               |
| <b>Zhang, 2005 (China) [126]</b> | 6 month RCT. | To evaluate the therapeutic efficacy of 'Yigu Capsule' in treating postmenopausal osteoporosis (PMO). | Unclear. | 126 Asian post-menopausal females (mean age: 61.6; BMI: 22.5) that suffered from osteoporosis. Participants were split into 3 groups, 2 of which, relevant to this SR. | <b>Calciferol</b> (alpha-D3) tablet with 1 placebo capsule (no dose provided). | Placebo capsule (provided by Jinan University hospital). 4 capsules after each meal, three times daily. | Unknown measurement method for <b>Estradiol (E2) &amp; Serum testosterone.</b> | Unknown measurement method for <b>calciferol.</b> | Natural Science Foundation of Guangdong Province (no.990475). |

|                                         |                                    |                                                                                                                                                                                                                                          |                        |                                                                                                     |                                                                                                             |                                                                                   |                                                                                                                               |                                                                                                                                          |                                                                                                                                             |
|-----------------------------------------|------------------------------------|------------------------------------------------------------------------------------------------------------------------------------------------------------------------------------------------------------------------------------------|------------------------|-----------------------------------------------------------------------------------------------------|-------------------------------------------------------------------------------------------------------------|-----------------------------------------------------------------------------------|-------------------------------------------------------------------------------------------------------------------------------|------------------------------------------------------------------------------------------------------------------------------------------|---------------------------------------------------------------------------------------------------------------------------------------------|
| <b>Zittermann, 2018 (Germany) [129]</b> | Post-hoc analysis of 36 month RCT. | To investigate (via secondary analysis of the EVITA trial) whether daily vitamin D3 for 3 years is able to improve male sex hormone concentrations in patients with advanced heart failure and low vitamin D concentrations (<75nmol/l). | Outpatient department. | 133 male chronic heart failure participants with low vitamin D (<75nmol/l) (mean age: 53, BMI: 29). | 4000IU of cholecalciferol per day as oily drops for 3 years. Subjects remained on heart failure medication. | Matched placebo for 3 years. Medication remained the same throughout this period. | <b>Sex hormone binding globulin and total testosterone</b> measured by 'Architect Autoanalyzer' (Abbott, Wiesbaden, Germany). | Circulating total <b>25OHD, total 1,25(OH)2 D</b> , concentrations measured by the autoanalyzer Liaison (DiaSorin, Stillwater, MN, USA). | Sponsored by the Heart and Diabetes Center (Germany).<br><br>The Friede Springer Herz Stiftung & Merck KGaA provided funding for the study. |
|-----------------------------------------|------------------------------------|------------------------------------------------------------------------------------------------------------------------------------------------------------------------------------------------------------------------------------------|------------------------|-----------------------------------------------------------------------------------------------------|-------------------------------------------------------------------------------------------------------------|-----------------------------------------------------------------------------------|-------------------------------------------------------------------------------------------------------------------------------|------------------------------------------------------------------------------------------------------------------------------------------|---------------------------------------------------------------------------------------------------------------------------------------------|
