# Supplementary material for: Effects of Dietary or Supplementary Micronutrients on Sex Hormones and IGF-1 in Middle and Older Age: A Systematic Review and Meta-Analysis
Source: MDPI journal article supplement (doi:10.3390/nu12051457), 2020-05-18
Supplement: s1 [file s1]

**Supplementary Table C - Sample Data Extraction Form**

| Characteristics of Study                                                         |  | Ref |
|----------------------------------------------------------------------------------|--|-----|
| <b>Study Id</b>                                                                  |  |     |
| <b>Article Title</b>                                                             |  |     |
| Author                                                                           |  |     |
| Funding                                                                          |  |     |
| Country                                                                          |  |     |
| Ethics                                                                           |  |     |
| Aims                                                                             |  |     |
| Study Design                                                                     |  |     |
| Setting                                                                          |  |     |
| <b>Subjects</b><br>Inclusion<br><br>Exclusion<br><br>Sample Size calculation     |  |     |
| <b>Dependant Variable</b><br><br>Measure of sex hormone<br><br>Micronutrient     |  |     |
| <b>Independent variable</b><br><br>Intervention<br><br>Control                   |  |     |
| <b>Intervention</b><br><br>N =<br>Age (mean)<br>Gender (M/F)<br>Ethnicity<br>BMI |  |     |
| <b>Control</b><br><br>N =<br>Age (mean)<br>Gender (M/F)<br>Ethnicity<br>BMI      |  |     |
| Duration of study                                                                |  |     |

**Supplementary Table C - Sample Data Extraction Form**

|                                 |  |  |
|---------------------------------|--|--|
| Length of Follow-up & Frequency |  |  |
|---------------------------------|--|--|

| Outcome Data     |  | Ref |
|------------------|--|-----|
| Type of analysis |  |     |
| Outcome name     |  |     |
| Conclusion       |  |     |

| No of participants |   | Lost to follow-up | INTERVENTION   |                         |         |     |
|--------------------|---|-------------------|----------------|-------------------------|---------|-----|
| M                  | F |                   | Baseline (s.d) | Post INTERVENTION (s.d) | P-Value | Ref |
|                    |   |                   |                |                         |         |     |
|                    |   |                   |                |                         |         |     |
|                    |   |                   |                |                         |         |     |
|                    |   |                   |                |                         |         |     |

| No of participants |   | Lost to follow-up | CONTROL        |                    |         |     |
|--------------------|---|-------------------|----------------|--------------------|---------|-----|
| M                  | F |                   | Baseline (s.d) | Post CONTROL (s.d) | P-Value | Ref |
|                    |   |                   |                |                    |         |     |
|                    |   |                   |                |                    |         |     |
|                    |   |                   |                |                    |         |     |
|                    |   |                   |                |                    |         |     |
